# Supplementary material for: Impacts of gold nanoparticle charge and ligand type on surface binding and toxicity to Gram-negative and Gram-positive bacteria
Source: Royal Society of Chemistry journal article supplement (doi:10.1039/c5sc00792e), 2015-01-01
Supplement: c5sc00792e2.pdf [file c5sc00792e2.pdf]

# Impacts of Gold Nanoparticle Charge and Ligand Type on Surface Binding and Toxicity to Gram-Negative and Gram-Positive Bacteria

Z. Vivian Feng<sup>a\*</sup>, Ian L. Gunsolus<sup>b</sup>, Tian A. Qiu<sup>b</sup>, Katie R. Hurley<sup>b</sup>, Lyle H. Nyberg<sup>a</sup>, Hilena Frew<sup>a</sup>, Kyle P. Johnson<sup>b</sup>, Ariane M. Vartanian<sup>c</sup>, Lisa M. Jacob<sup>c</sup>, Samuel E. Lohse<sup>c, 1</sup>, Marco D. Torelli<sup>d</sup>, Robert J. Hamers<sup>d</sup>, Catherine J. Murphy<sup>c</sup>, and Christy L. Haynes<sup>b\*</sup>

## Supporting Information

### Table of Contents:

- **Figure S1.** Representative transmission electron micrographs of MPA-, MPNH<sub>2</sub>-, and PAH-AuNPs.
- **Figure S2.** Sample images from colony counting assays.
- **Figure S3.** Representative cytograms
- Calculation of PAH-ligand concentration on 5 µg/mL 4-nm PAH-AuNPs

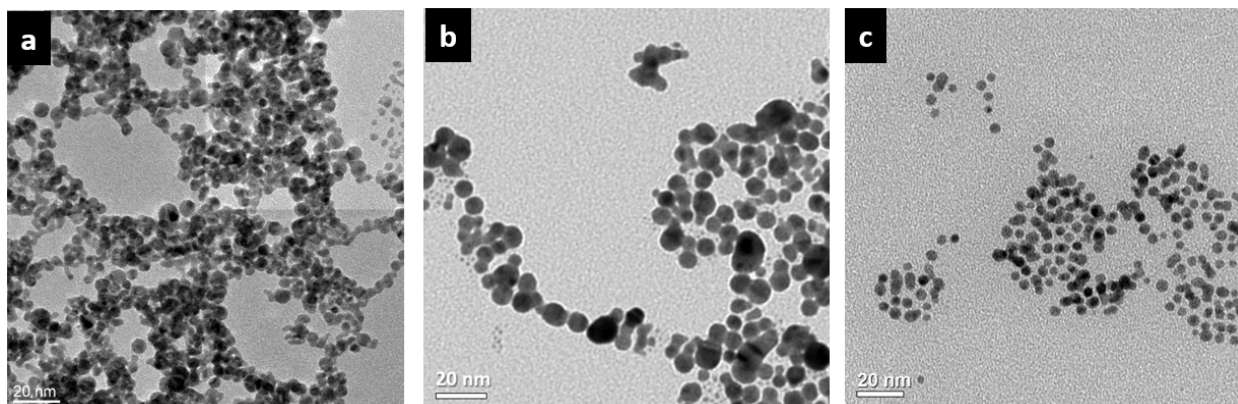

**Figure S1.** Representative transmission electron micrographs of (a) MPA-AuNPs, (b) MPNH<sub>2</sub>-AuNPs, and (c) PAH-AuNPs.

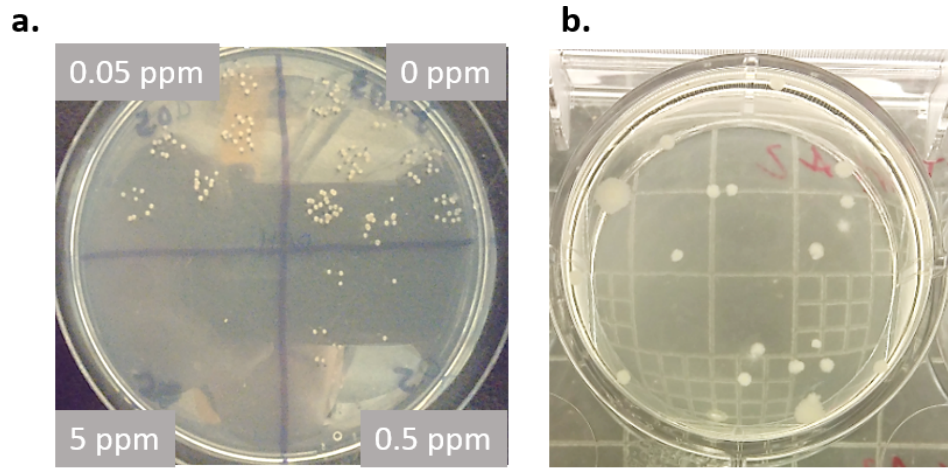

**Figure S2.** Representative results from plates used in colony counting methods: (a) drop plate for *Shewanella*, and (b) pour plate for *Bacillus*. The apparent variation in colony sizes in the *Bacillus* plate was due to the location of the colonies in the agar matrix, where smaller colonies were inside the matrix and the larger ones were on the surface.

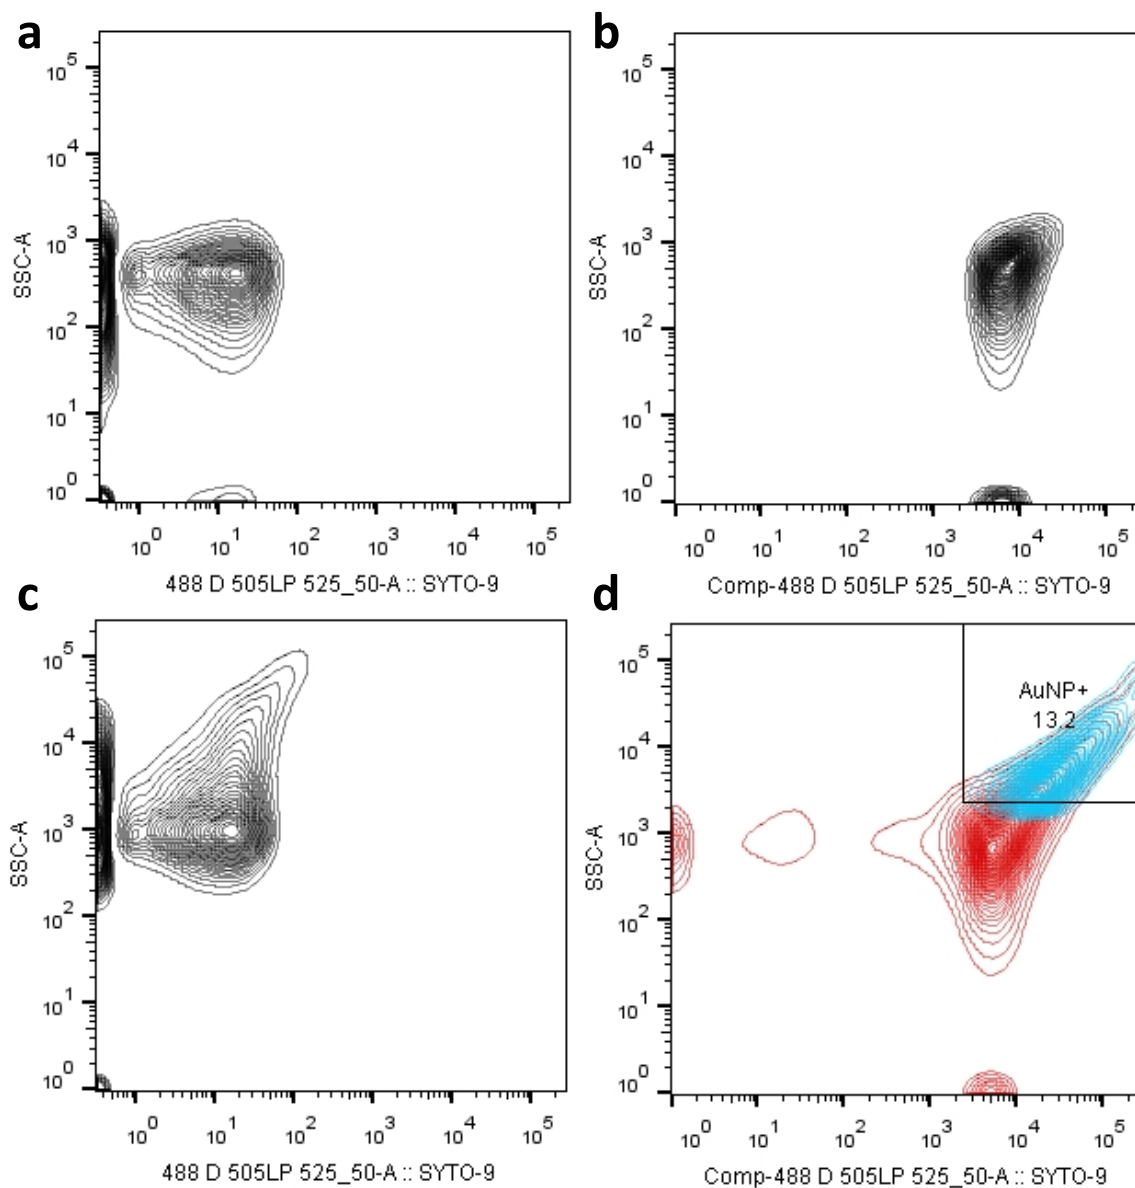

**Figure S3.** Sample cytograms of (a) unstained *Bacillus* cells, (b) SYTO 9-stained *Bacillus* cells, (c) AuNPs alone, and (d) SYTO 9-stained *Bacillus* with 5  $\mu\text{g/mL}$  MPNH<sub>2</sub>-AuNPs. Both axes are in arbitrary units corresponding to detector signals (vertical: side scattering detector at  $\lambda = 488 \pm 10$  nm); horizontal: fluorescence detector channel at  $\lambda = 510 \pm 10$  nm).

### Determination of PAH-ligand concentration in 5 µg/mL 4-nm PAH-AuNPs

$$\text{AuNP diameter} = 4\text{nm}$$

$$\text{Volume}_{\text{AuNP}} = \frac{4}{3}\pi\left(\frac{4}{2}\right)^3 = 33.5\text{nm}^3 = 3.35 \times 10^{-20}\text{cm}^3$$

$$\text{Density}_{\text{Au}} = 19.3\text{g/cm}^3$$

$$\text{Mass}_{\text{Au}} = (3.35 \times 10^{-20}\text{cm}^3) \times (19.3\text{g/cm}^3) = 6.47 \times 10^{-19}\text{g}$$

$$\# \text{ AuNP} / \text{L} = \frac{(5\text{mg/L}) \times (0.001\text{g/mg})}{6.47 \times 10^{-19}\text{g}} = 7.73 \times 10^{15}$$

$$M_w \text{ of PAH} = 15000\text{g/mol}$$

$$\# \text{ PAH} / \# \text{ AuNP} = 4$$

$$[\text{PAH}](\mu\text{g/mL}) = \frac{(15000\text{g/mol}) \times 4 \times (7.73 \times 10^{15} / \text{L}) \times (1000\text{mg/g})}{6.02 \times 10^{23} / \text{mol}} = 0.77\text{mg/L} = 0.77\mu\text{g/mL}$$
